# Supplementary material
Source: publisher figshare collection journal article supplement (https://rs.figshare.com/ndownloader/files/14050457)
Supplement: Supplementary file 1 [file 14050457]

## Sheet: Sheet1
Table S5. Review of evidence for the placement of Anallacta in Blattellinae. Characters come from Grandcolas (1996). “?” indicates an uncertain state.
Character number in Grandcolas 1996	Character	State in Blattellinae	State in Pseudophyllodromiinae	State in our specimen
24	Genital symmetry	1	0	1
25	L3d ring shaped (1), or not ring shaped (0)	1	0	0
27	Vestibular sclerite small (1) or large (0)	1	0	?
28	Lateral sternites IX in crosspieces narrow (1) or wider (0)	1	0	?
60	Ootheca rotated (1) or held with keel dorsal (0)	1	0	?
61	Cleft of R2 directed forward (1) or backward (0)	1	0	?
63	First vein of vannus with a dichotomoy leading to two straight rami (1) or vein with a dichotomy leading to two curved rami that soon diverge (0)	1	0	1?
26	R3v horseshoe shaped (1) or not (0)	0	1	1?
58	R3d, somewhat elongated transversely (1) or elongated longitudinally (0)	0	1	1
